# Supplementary material for: Enantiomeric copper based anticancer agents promoting sequence-selective cleavage of G-quadruplex telomeric DNA and non-random cleavage of plasmid DNA
Source: Royal Society of Chemistry journal article supplement (doi:10.1039/d0mt00084a), 2020-04-28
Supplement: d0mt00084a1.pdf [file d0mt00084a1.pdf]

## Electronic Supplementary Information

### Enantiomeric Copper Based Anticancer Agents Promoting Site-Specific Cleavage of G-Quadruplex Telomeric DNA and non-random cleavage of plasmid DNA

Sabiha Parveen<sup>a</sup>, J. A. Cowan<sup>b</sup>, Zhen Yu<sup>b</sup> and Farukh Arjmand<sup>a\*</sup>

<sup>a</sup>Department of Chemistry, Aligarh Muslim University, Aligarh 202002, Uttar Pradesh, India.

<sup>b</sup>Department of Chemistry and Biochemistry, The Ohio State University, 100 West 18th Avenue, Columbus, OH 43210 (USA).

\*Correspondence to: Dr. Farukh Arjmand, Department of Chemistry, Aligarh Muslim University, Aligarh 202002, Uttar Pradesh, India. tel: 0571 2703893, e-mail: farukh.arjmand18@gmail.com

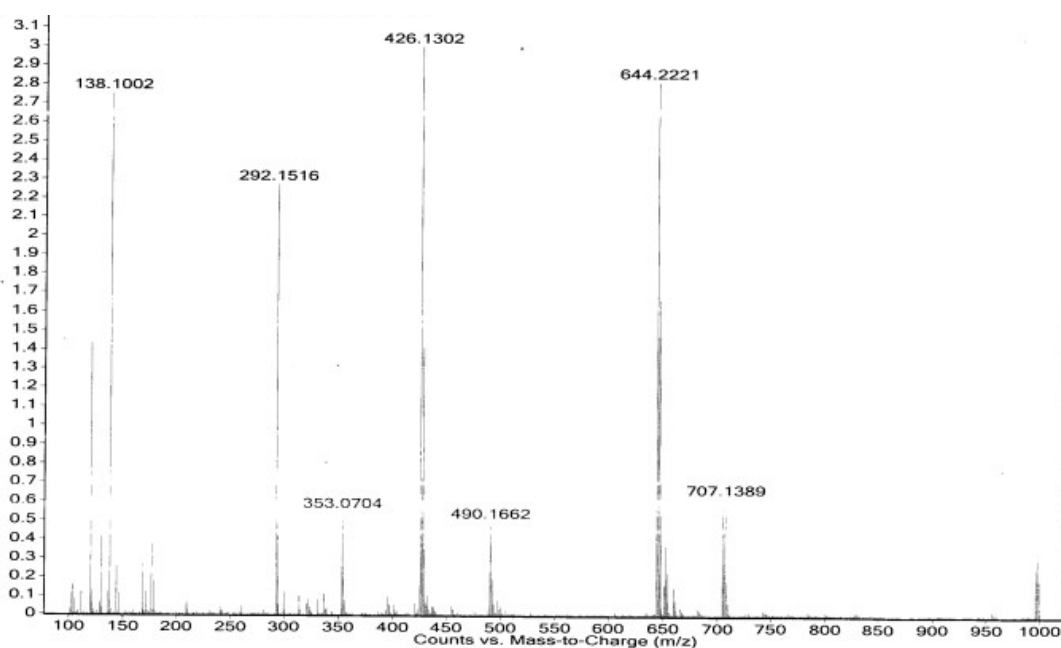

**Fig. S1(i)** ESI-Mass spectrum of complex **1<sub>s</sub>**.

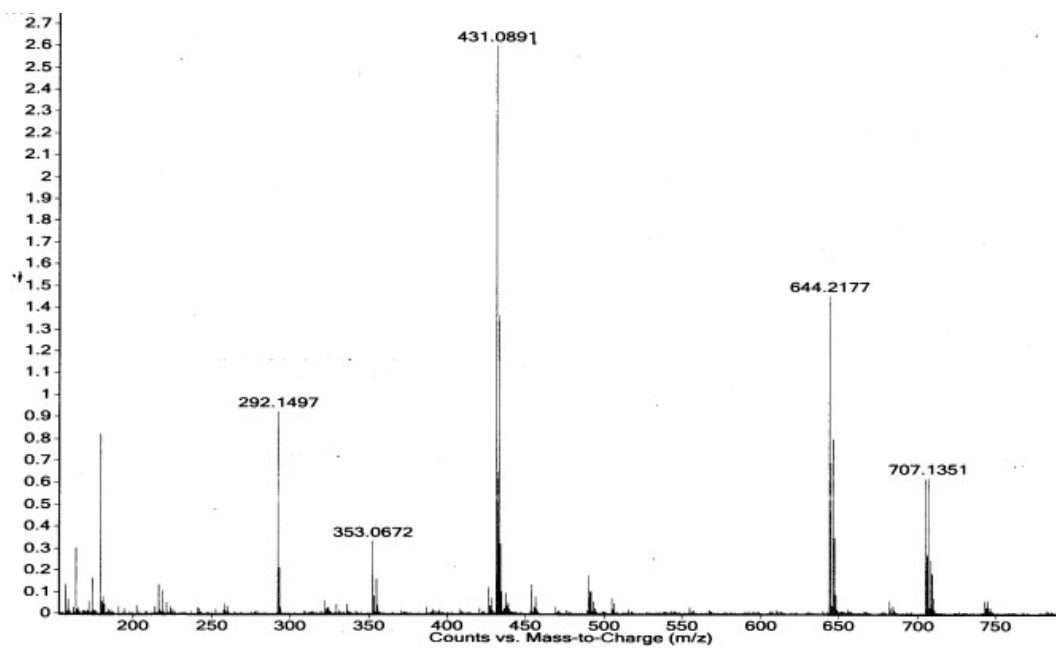

**Fig. S1 (ii)** ESI-Mass spectrum of complex  $1_R$ .

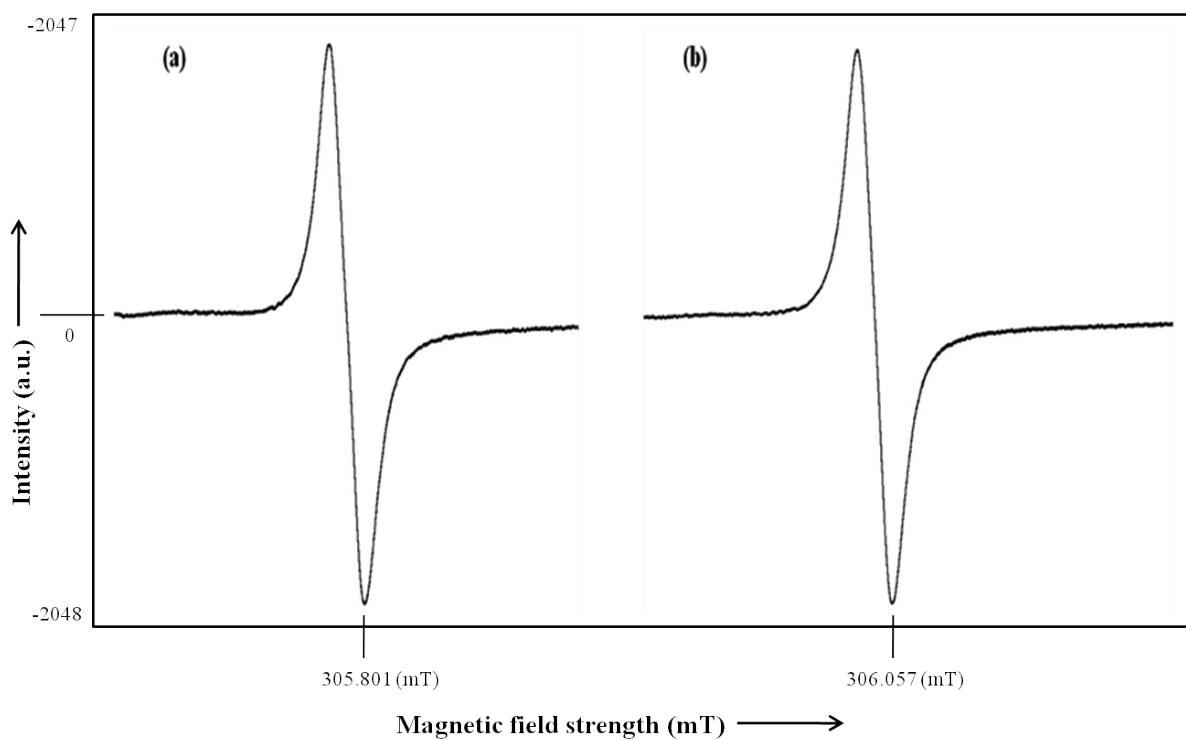

**Fig. S2** EPR spectra of complexes (a)  $1_S$  and (b)  $1_R$ .

**Binding studies with CT-DNA**

DNA interaction studies of complexes  $\mathbf{1}_S$  and  $\mathbf{1}_R$  were carried out by electronic absorption at  $\lambda_{\max}$  ca. 274 and 270 nm, respectively following titration with aliquots of CT-DNA ( $0.00\text{--}3.33 \times 10^{-5}$  M). The results demonstrated ‘hyperchromicity’ with no significant shift in absorption intensities (Fig. S3) and indicative of an electrostatic mode of binding.<sup>1</sup>

The intrinsic binding constant ( $K_b$ ) values were quantified and found to be  $5.031(\pm 0.126) \times 10^4$ ,  $3.862(\pm 0.235) \times 10^4$  M<sup>-1</sup> for  $\mathbf{1}_S$  and  $\mathbf{1}_R$ , respectively. The binding propensity of S-enantiomer to CT-DNA was higher in magnitude than the corresponding R-enantiomer, underscoring the sensitive discrimination between two conformations. Most likely the higher affinity of S-enantiomer for DNA helix reflects a better fit to right-handed B-DNA due to compatible molecular symmetry based on the two-pole complementary principle.<sup>2</sup>

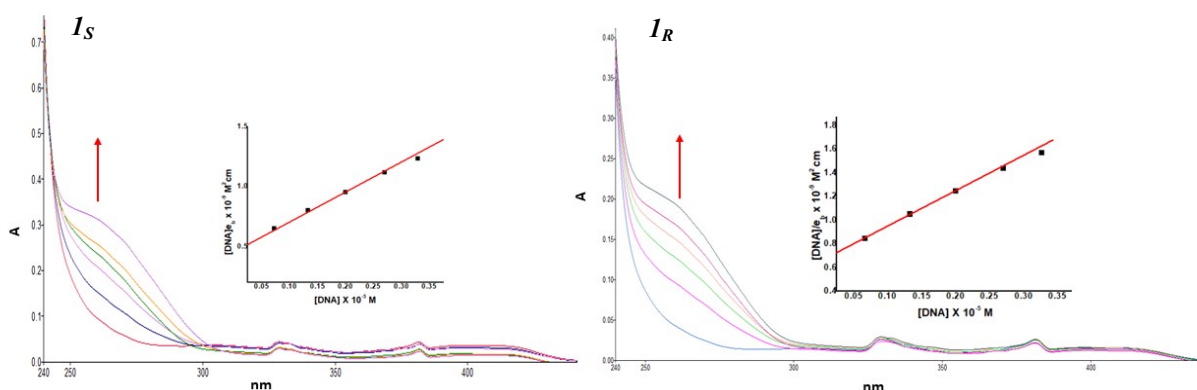

**Fig. S3** Absorption spectral traces of complexes  $\mathbf{1}_S$  and  $\mathbf{1}_R$  in Tris-HCl buffer upon addition of CT-DNA at 25 °C. Inset: plots of  $[DNA]/\epsilon_b$  vs.  $[DNA]$  for the titration of CT-DNA with complexes,  $[Complex] 0.67 \times 10^{-5}$  M,  $[DNA] 0\text{--}3.33 \times 10^{-5}$  M.

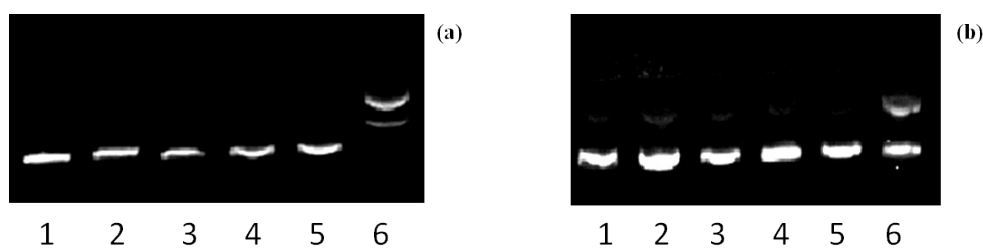

**Fig. S4** Control reactions for DNA cleavage (a) **1<sub>S</sub>** and (b) **1<sub>R</sub>**, carried out in 10 mM Tris buffer, pH =7.4, 37 °C, for 30 min, with [DNA] = 50 μM for each reaction. Lane (1) DNA starting material; (2) DNA spontaneous reaction; (3) DNA + Asc 1mM; (4) DNA + Asc + H<sub>2</sub>O<sub>2</sub> 1mM; (5) DNA + 10nM **1<sub>S</sub>**/**1<sub>R</sub>**. (6) DNA+ 1 mM Asc+ 1 mM H<sub>2</sub>O<sub>2</sub> + 10nM **1<sub>S</sub>**/**1<sub>R</sub>**.

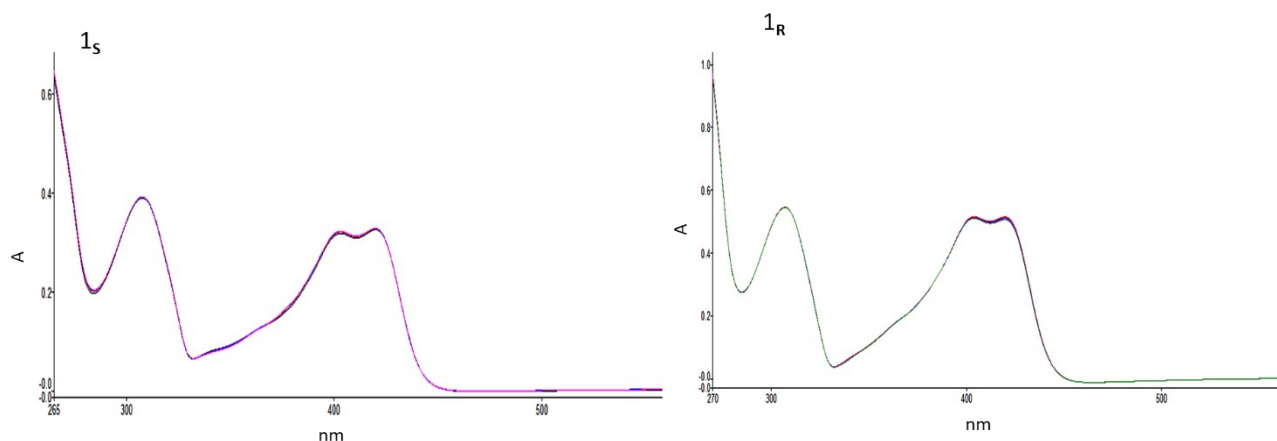

**Fig. S5** UV-vis absorption spectra of complexes **1<sub>S</sub>** and **1<sub>R</sub>** at different time intervals (0 h, 1 h, 12 h, and 24 h).

## References

- 1 S. Parveen, M. Usman, S. Tabassum and F. Arjmand, Synthesis of chiral R/S-pseudopeptide-based Cu(II) & Zn(II) complexes for use in targeted delivery for antitumor therapy: enantiomeric discrimination with CT-DNA and pBR322 DNA hydrolytic cleavage mechanism, *RSC Adv.*, 2015, **5**, 72121–72131.
- 2 P. Yang and M. Guo, Interaction of Some Non-Platinum Metal Anticancer Complexes With Nucleotides and DNA and The Two-Pole Complementary Principle (TPCP) Arising Therefrom, *Met.-Based Drugs*, 1998, **5**, 41–58.
